# Supplementary material for: ETV7 limits antiviral gene expression and control of SARS-CoV-2 and influenza viruses
Source: bioRxiv or medRxiv preprint supplement (doi:10.1101/851543), 2020-07-31
Supplement: Supplementary file [file media-1.pdf]

# Supplemental Material

Froggatt *et al.*

**Supplementary Table 1: Hits from CRISPRa screen for negative regulators of the type I IFN response.**

| <b>Gene</b> | <b>Induced by IFN &gt;2x (Interferome)</b> | <b>HGNC Official Full Name</b>                                                     |
|-------------|--------------------------------------------|------------------------------------------------------------------------------------|
| C1GALT1     | Yes                                        | core 1 synthase, glycoprotein-N-acetylgalactosamine 3-beta-galactosyltransferase 1 |
| CASC3       | No                                         | CASC3 exon junction complex subunit                                                |
| ETV7        | Yes                                        | ETS variant transcription factor 7                                                 |
| GGT1        | No                                         | gamma-glutamyltransferase 1                                                        |
| GOLGA6D     | No                                         | golgin A6 family member D                                                          |
| IMPAD1      | No                                         | inositol monophosphatase domain containing 1                                       |
| LAPTM5      | No                                         | lysosomal protein transmembrane 5                                                  |
| NUP153      | Yes                                        | nucleoporin 153                                                                    |
| PCP2        | No                                         | Purkinje cell protein 2                                                            |
| RRM2B       | No                                         | ribonucleotide reductase regulatory TP53 inducible subunit M2B                     |

Ten hits identified using overlap between two replicate screens. Hits selected for validation were determined to be induced at least two-fold after IFN treatment in the Interferome database (1).

**Supplementary Table 2: ISRE sequences identified in the literature.**

| Gene                  | ISRE sequence     | Reference                   | Ref # |
|-----------------------|-------------------|-----------------------------|-------|
| <i>Consensus ISRE</i> | N GAAA NN GAAA CT | Bluyssen et al. (1994)      | (2)   |
| BST2                  | G GAAA CT GAAA CT | Ohtomo et al. (1999)        | (3)   |
| IFI35                 | G GAAA T GAAA GT  | Yang et al. (2012)          | (4)   |
| IFIT1                 | G GAAA GT GAAA CT | Bluyssen et al. (1994)      | (2)   |
|                       | G GAAA CC GAAA GG | Wathelet et al. (1998)      | (5)   |
| IFIT2                 | G GAAA GT GAAA CT | Levy et al. (1988)          | (6)   |
| IRF9                  | A GAA CT GAAA CT  | Testoni et al. (2011)       | (7)   |
| ISG15                 | G GAAA CC GAAA CT | Testoni et al. (2011)       | (7)   |
|                       | G GAAA GG GAAA CC | Testoni et al. (2011)       | (7)   |
| OAS1                  | G GAAA C GAAA CC  | Rutherford et al. (1988)    | (8)   |
| OAS2                  | G GAAA CT GAAA CT | Wang and Floyd-Smith (1997) | (9)   |
| OAS3                  | G GAAA AC GAAA CC | Rebouillat et al. (2000)    | (10)  |
|                       | C GAAA CT GAAA GC | Rebouillat et al. (2000)    | (10)  |
| OASL                  | A GAA TC GAAA CT  | Wang et al. (2010)          | (11)  |

Consensus ISRE with potential ETS sites highlighted in blue. ISGs and their identified ISRE sequences with ETS sites highlighted in yellow and non-ETS sites highlighted in gray.

**Supplementary Figure 1.**

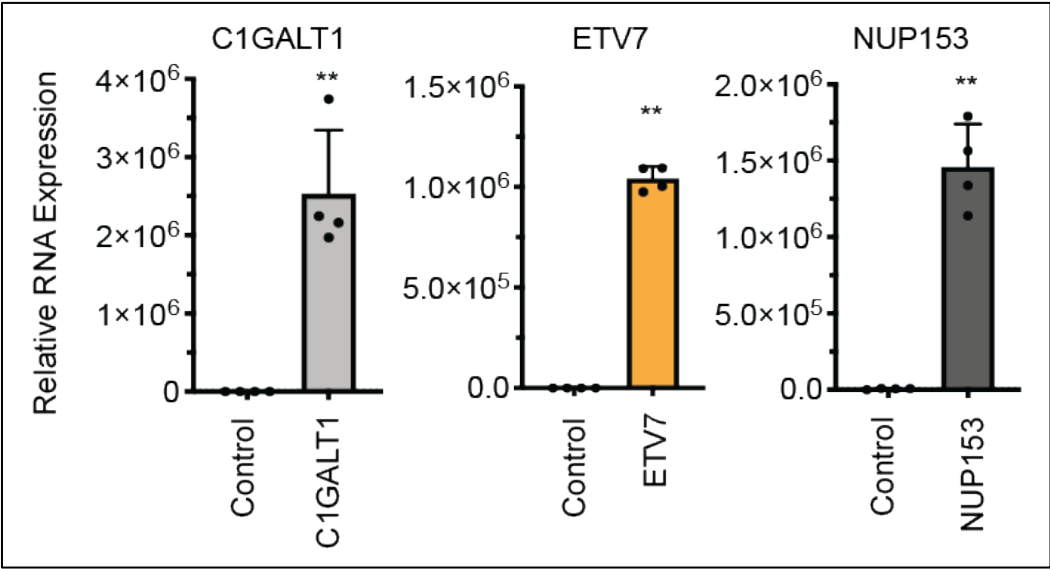

**Supplementary Figure 1: Overexpression of screen hits for validation.** RT-qPCR of three screen hits, C1GALT1, NUP153, and ETV7, in 293T cells confirms their overexpression after transfection of a pLex vector containing the respective gene. Data shown are representative of two independent experiments. P-values calculated using unpaired, two-tailed Student's t-tests (\*p<0.05, \*\*p<0.001) compared to mCherry-expressing control samples.

## Supplementary Figure 2.

| ETV7 KO1 genomic locus |                                                                                                      | Peptide Length     |
|------------------------|------------------------------------------------------------------------------------------------------|--------------------|
| <b>WT</b>              | 5' G TAC TCT CTG CCA TGC ACC <u>GCG GAG CAC</u> GGG TTC <u>GAG ATG</u> AAC GGA CGC GCC CTC TGC AT 3' | <i>WT</i> 342aa    |
| N-term                 | Y S L P C T A E H G F E M N G R A L C C-term                                                         |                    |
| <b>KO1 c1</b>          | 5' G TAC TCT CTG CCA TGC ACC GCG <b>GAA</b> GCA CGG GTT CGA GAT GAA CGG ACG CGC CCT CTG CAT 3'       | <i>trunc</i> 104aa |
| N-term                 | Y S L P C T A E A R V R D E R T R P L H C-term                                                       |                    |
| <b>KO1 c2</b>          | 5' G TAC TCT CTG CCA TGC ACC GCG <b>GAA</b> GCA CGG GTT CGA GAT GAA CGG ACG CGC CCT CTG CAT 3'       | <i>trunc</i> 104aa |
| N-term                 | Y S L P C T A E A R V R D E R T R P L H C-term                                                       |                    |
| ETV7 KO2 genomic locus |                                                                                                      | Peptide Length     |
| <b>WT</b>              | 5' TC CCC GCG ATG CCG CAG GCC <u>CCC ATT GAC GGC AGG ATC GCT</u> Ggtgagtgggaggctgttc 3'              | <i>WT</i> 342aa    |
| N-term                 | P A M P Q A P I D G R I A C-term                                                                     |                    |
| <b>KO2 c1</b>          | 5' TC CCC GCG ATG CCG CAG GCC CCC ATT GAC G-- --- --- -CT Ggtgagtgggaggctgttc 3'                     | <i>del</i> 333aa   |
| N-term                 | P A M P Q A P I D A C-term                                                                           |                    |
| <b>KO2 c2</b>          | 5' TC CCC GCG ATG CCG CAG GCC CCC ATT GAC GGC AGG --- --- --tgagtgggaggctgttc 3'                     | <i>lss</i> unknown |
| N-term                 | P A M P Q A P I D G R C-term                                                                         |                    |
| <b>KEY</b>             |                                                                                                      |                    |
| c1, c2                 | = copy 1, copy 2                                                                                     |                    |
| UPPERCASE              | = exonic                                                                                             |                    |
| lowercase              | = intronic                                                                                           |                    |
| <u>underlined</u>      | = sgRNA sequence                                                                                     |                    |
| <b>highlighted</b>     | = insertion                                                                                          |                    |
| --dashes--             | = deletion                                                                                           |                    |
| <i>italicized</i>      | = description of resulting peptide (see below)                                                       |                    |
| <i>trunc</i>           | = truncation                                                                                         |                    |
| <i>del</i>             | = deletion                                                                                           |                    |
| <i>lss</i>             | = loss of splice site                                                                                |                    |

**Supplementary Figure 2: DNA lesions in ETV7 KO cell lines.** Sequences of the ETV7 KO target regions and the predicted impact on the peptide sequence.

Supplementary Figure 3.

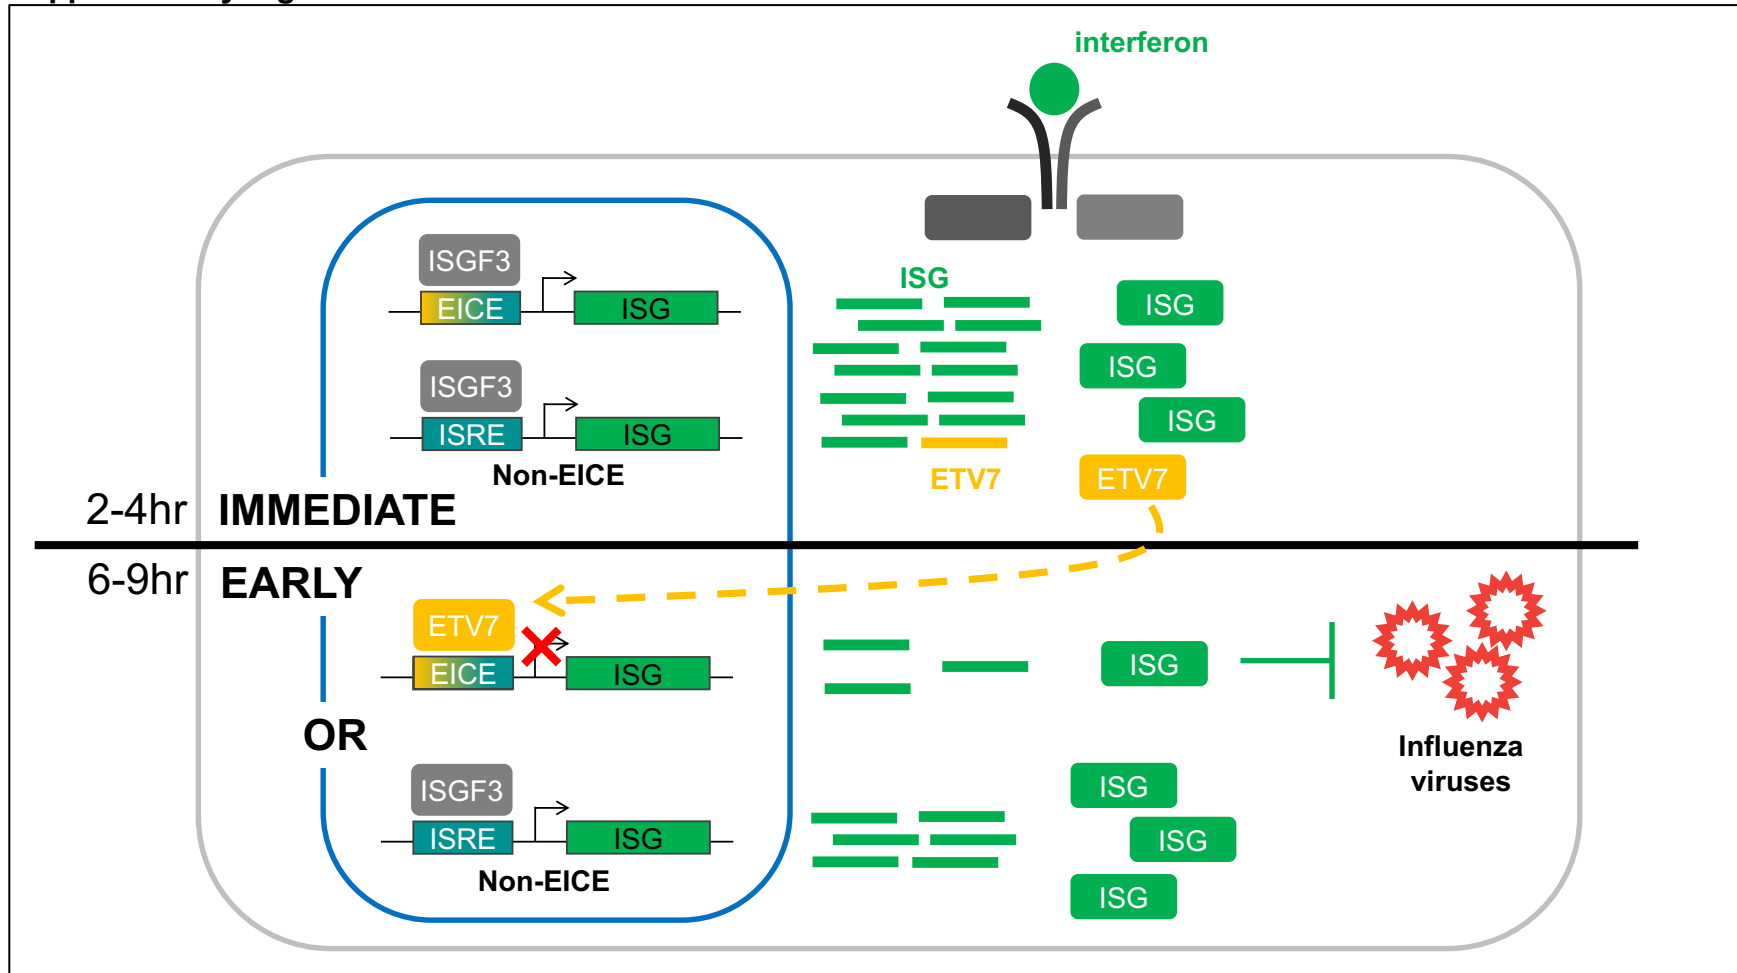

**Supplementary Figure 3: Model of ETV7 activity during the type I IFN response.** IFN $\alpha/\beta$  binds its receptor, resulting in the translocation of STAT1/2 and IRF9 (ISGF3) into the nucleus where they bind ISREs, including EICEs, inducing ISG expression. ETV7 is expressed during this initial round of gene induction to then bind EICEs, suppressing further induction of specific ISGs, early during the IFN response. Many of the ISGs most affected by ETV7 negatively regulate influenza virus replication (12).

## Supplemental References

1. I. Rusinova, *et al.*, INTERFEROME v2.0: an updated database of annotated interferon-regulated genes. *Nucleic Acids Res.* **41**, D1040–D1046 (2012).
2. H. A. R. Bluysen, *et al.*, Structure, Chromosome Localization, and Regulation of Expression of the Interferon-Regulated Mouse Ifi54/Ifi56 Gene Family. *Genomics* **24**, 137–148 (1994).
3. T. Ohtomo, *et al.*, Molecular Cloning and Characterization of a Surface Antigen Preferentially Overexpressed on Multiple Myeloma Cells. *Biochem. Biophys. Res. Commun.* **258**, 583–591 (1999).
4. W. Yang, *et al.*, Interferon- $\gamma$  Upregulates Expression of IFP35 Gene in HeLa Cells via Interferon Regulatory Factor-1. *PLoS One* **7** (2012).
5. M. G. Wathélet, *et al.*, Virus infection induces the assembly of coordinately activated transcription factors on the IFN-beta enhancer in vivo. *Mol. Cell* **1**, 507–18 (1998).
6. D. E. Levy, D. S. Kessler, R. Pine, N. Reich, J. E. Darnell, Interferon-induced nuclear factors that bind a shared promoter element correlate with positive and negative transcriptional control. *Genes Dev.* **2**, 383–93 (1988).
7. B. Testoni, *et al.*, p53-paralog DNp73 oncogene is repressed by IFN $\alpha$ /STAT2 through the recruitment of the Ezh2 polycomb group transcriptional repressor. *Oncogene* **30**, 2670–8 (2011).
8. M. N. Rutherford, G. E. Hannigan, B. R. Williams, Interferon-induced binding of nuclear factors to promoter elements of the 2-5A synthetase gene. *EMBO J.* **7**, 751–9 (1988).
9. Q. WANG, G. FLOYD-SMITH, The p69/71 2-5A Synthetase Promoter Contains Multiple Regulatory Elements Required for Interferon- $\alpha$ -Induced Expression. *DNA Cell Biol.* **16**, 1385–1394 (1997).
10. D. Rebouillat, A. Hovnanian, G. David, A. G. Hovanessian, B. R. G. Williams, Characterization of the Gene Encoding the 100-kDa Form of Human 2',5'Oligoadenylate Synthetase. *Genomics* **70**, 232–240 (2000).
11. N. Wang, *et al.*, Viral induction of the zinc finger antiviral protein is IRF3-dependent but NF-kappaB-independent. *J. Biol. Chem.* **285**, 6080–90 (2010).
12. A. García-Sastre, Induction and evasion of type I interferon responses by influenza viruses. *Virus Res.* **162**, 12–18 (2011).
